# Supplementary material for: Can the Integration of Water and Fertilizer Promote the Sustainable Development of Rice Production in China?
Source: MDPI journal article supplement (doi:10.3390/agriculture14040585), 2024-04-08
Supplement: s1 [file s1]

**Table S1**

Resource consumption for drying-wetting water and fertilizer management (FEM) and the water and fertilizer integration (AIM) in Dongpo District from 2020 and 2021 (2-year average).

| S.N. | Items                                | Units                           | FEM     | AIM     |
|------|--------------------------------------|---------------------------------|---------|---------|
| A.   | Machinery                            |                                 |         |         |
| 1.   | Sowing machine                       | h ha <sup>-1</sup>              | 0.50    | 0.50    |
| 2.   | Tillage machine                      | h ha <sup>-1</sup>              | 4.13    | 4.13    |
| 3.   | Leveling machine                     | h ha <sup>-1</sup>              | 3.53    | 3.53    |
| 5.   | Rice transplanter                    | h ha <sup>-1</sup>              | 3.22    | 3.22    |
| 7.   | Fertilization machine                | h ha <sup>-1</sup>              | 3.22    | 3.22    |
| 8.   | Pesticide sprayer                    | h ha <sup>-1</sup>              | 3.22    | 3.22    |
| 9.   | Water-fertilizer integration machine | h ha <sup>-1</sup>              | 0.00    | 30.23   |
| 10.  | Drone                                | h ha <sup>-1</sup>              | 0.45    | 0.45    |
| 11.  | Harvester                            | h ha <sup>-1</sup>              | 2.02    | 2.02    |
| B.   | Human labor                          | man-h ha <sup>-1</sup>          | 231.60  | 196.33  |
| C.   | Fuel                                 |                                 |         |         |
| 1.   | Diesel                               | L ha <sup>-1</sup>              | 50.88   | 50.88   |
| 2.   | Electricity                          | kWh ha <sup>-1</sup>            | 1.25    | 28.29   |
| D.   | Fertilizer                           |                                 |         |         |
| 3.   | Nitrogen                             | kg ha <sup>-1</sup>             | 150.09  | 123.03  |
| 4.   | Phosphorus                           | kg ha <sup>-1</sup>             | 75.64   | 61.28   |
| 5.   | Potassium                            | kg ha <sup>-1</sup>             | 149.15  | 123.02  |
| E.   | Others                               |                                 |         |         |
| 1.   | Water                                | m <sup>3</sup> ha <sup>-1</sup> | 3854.98 | 2713.90 |
| 2.   | Plastic film                         | kg ha <sup>-1</sup>             | 1.46    | 1.46    |
| 3.   | Insecticide                          | kg ha <sup>-1</sup>             | 2.42    | 1.77    |
| 4.   | Herbicide                            | kg ha <sup>-1</sup>             | 0.53    | 0.42    |
| 5.   | Fungicide                            | kg ha <sup>-1</sup>             | 0.65    | 0.50    |
| 6.   | Seed                                 | kg ha <sup>-1</sup>             | 18.01   | 18.01   |

**Table S2**

Description of parameters needed for estimating energy inputs with machinery.

| S.<br>N. | Implements                                         | Type                                                                                                           | Unit weight<br>(kg) | Fuel<br>consumption<br>(h <sup>-1</sup> ) | Operational<br>life<br>(h) | Field<br>working<br>efficiency(<br>%) | Power<br>source |
|----------|----------------------------------------------------|----------------------------------------------------------------------------------------------------------------|---------------------|-------------------------------------------|----------------------------|---------------------------------------|-----------------|
| A.       | Field preparation                                  |                                                                                                                |                     |                                           |                            |                                       |                 |
| 1.       | Tillage machine                                    | 4WD 62.7 kW diesel engine KUBOTA M854K tractor with plough                                                     | 3400                | 16.85                                     | 2500                       | 65                                    | Diesel          |
| 2.       | Leveling machine                                   | 4WD 62.7 kW diesel engine KUBOTA M854K tractor with harrow                                                     | 3250                | 13.40                                     | 2500                       | 65                                    | Diesel          |
| B.       | Seeds preparation                                  |                                                                                                                |                     |                                           |                            |                                       |                 |
|          | Sowing machine                                     | 370W YAZAKI SYS1000C rice seed planter                                                                         | 210                 | 370 W                                     | 1500                       | 75                                    | Electricity     |
| C.       | Transplanter machine                               | 4WD 16.1 kW diesel engine KUBOTA SPV-8C25 rice transplanter                                                    | 860                 | 3.60                                      | 3000                       | 60                                    | Diesel          |
| D.       | Field management                                   |                                                                                                                |                     |                                           |                            |                                       |                 |
| 1.       | Fertilization machine for the first fertilizing    | KUBOTA FSPV8C25 driven by KUBOTA SPV-8C25 engine and completed synchronously with transplanting/direct seeding | 62.5                | 0.42                                      | 1500                       | 70                                    | Diesel          |
| 2.       | Pesticide sprayer for the first pesticide spraying | KUBOTA CS-6C driven by KUBOTA SPV-8C25 engine and completed synchronously with transplanting seeding           | 35.0                | 0.36                                      | 1500                       | 70                                    | Diesel          |
| 3.       | Water-fertilizer integration machine               | 150 W power engine of BOYUN with fertilizer pipeline                                                           | 35.0                | 150W                                      | 1800                       | 65                                    | Electricity     |
| 4.       | Pesticide sprayer                                  | 4.6 KW power engine of DJI T16 with fertilizer sprayer                                                         | 42                  | 4.60 kW                                   | 1000                       | 85                                    | Electricity     |
| E.       | Harvesting and threshing                           |                                                                                                                | 3750                | 16.25                                     | 3500                       | 60                                    | Diesel          |

**Table S3**

Energy equivalents of agricultural inputs and outputs.

| Particulars                                  | Unit           | Energy equivalent(MJ unit <sup>-1</sup> ) | References |
|----------------------------------------------|----------------|-------------------------------------------|------------|
| A. Inputs                                    |                |                                           |            |
| 1. Machinery                                 | h              | 62.70                                     | [26]       |
| 2. Labor                                     | h              | 1.96                                      | [27]       |
| 3. Diesel (including the cost of lubricants) | L              | 56.31                                     | [28]       |
| 4. Electricity                               | kWh            | 3.60                                      | [29]       |
| 5. Chemical fertilizer                       |                |                                           |            |
| Nitrogen (N)                                 | kg             | 66.14                                     | [30]       |
| Phosphorus (P <sub>2</sub> O <sub>5</sub> )  | kg             | 12.44                                     | [30]       |
| Potassium (K <sub>2</sub> O)                 | kg             | 11.15                                     | [31]       |
| 6. Water                                     | m <sup>3</sup> | 1.02                                      | [28]       |
| 7. Pesticide                                 |                |                                           |            |
| Insecticide                                  | kg             | 101.20                                    | [32]       |
| Herbicide                                    | kg             | 238.00                                    | [32]       |
| Fungicide                                    | kg             | 216.00                                    | [33]       |
| 8. Plastic film                              | kg             | 158.00                                    | [29]       |
| 9. Seed                                      | kg             | 14.70                                     | [34]       |
| B. Outputs                                   |                |                                           |            |
| 1. Rice grain                                | kg             | 17.00                                     | [34]       |
| 2. Straw                                     | kg             | 12.50                                     | [34]       |

**Table S4**

Emission factors are used for estimating greenhouse gas emissions from manufacturing, packaging, and transportation of agricultural inputs.

| Particulars       | Unit | Emission factor (kg CO <sub>2</sub> -eq unit <sup>-1</sup> ) | References |
|-------------------|------|--------------------------------------------------------------|------------|
| Machinery         | MJ   | 0.071                                                        | [38]       |
| Diesel            | l    | 2.75                                                         | [39]       |
| Urea              | kg   | 2.51                                                         | [40]       |
| Superphosphate    | kg   | 0.17                                                         | [41]       |
| Muriate of potash | kg   | 0.23                                                         | [41]       |
| Insecticide       | kg   | 5.10                                                         | [42]       |
| Herbicide         | kg   | 6.30                                                         | [42]       |
| Fungicide         | kg   | 3.90                                                         | [42]       |
| Rice seed         | kg   | 0.78                                                         | [43]       |
| Plastic film      | kg   | 1.47                                                         | [44]       |
| Electricity       | KWh  | 1.12                                                         | [44]       |

**Table S5**

Unit prices of rice grain and the various inputs. Data were retrieved from National Development and Reform Commission.

| Particulars                                     | Unit | Price (\$ unit <sup>-1</sup> ) |
|-------------------------------------------------|------|--------------------------------|
| 1. Machinery                                    |      |                                |
| Tillage, leveling, and harvester                | h    | 13.85                          |
| Transplanter                                    | h    | 16.23                          |
| Sowing machine                                  | h    | 75.00                          |
| Fertilization machine for the first fertilizing | h    | 0.26                           |
| 2. Drone                                        | h    | 92.31                          |
| 3. Labor                                        | h    | 2.20                           |
| 4. Diesel                                       | l    | 0.95                           |
| 5. Urea                                         | kg   | 0.29                           |
| 6. Superphosphate                               | kg   | 0.10                           |
| 7. Muriate of potash                            | kg   | 0.45                           |
| 8. Insecticide                                  | kg   | 72.26                          |
| 9. Herbicide                                    | kg   | 120.44                         |
| 10. Fungicide                                   | kg   | 316.16                         |
| 11. Rice seed                                   | kg   | 9.55                           |
| 12. Plastic film                                | kg   | 0.45                           |
| 13. Electricity                                 | kWh  | 0.08                           |
| 14. Single-season indica rice                   | kg   | 0.40                           |
